# Supplementary material for: Studies on fluorescence determination of nanomolar Cr(iii) in aqueous solutions using unmodified silver nanoparticles
Source: Royal Society of Chemistry journal article supplement (doi:10.1039/c2ay25632k), 2012-01-01

# Studies on fluorescence determination of nanomolar Cr (III) in aqueous solutions using unmodified silver nanoparticles

Elavarasi.M<sup>1</sup>, Madona L Paul<sup>1</sup>, Rajeshwari A<sup>1</sup>, N. Chandrasekaran<sup>1</sup> and A. B. Mandal<sup>2</sup>,  
Amitava Mukherjee<sup>1\*</sup>

<sup>1</sup>Centre for Nanobiotechnology, VIT University, Vellore, India  
<sup>2</sup>Chemical Laboratory, Central Leather Research Institute, Chennai, India

Supplementary information

§ **Corresponding author**

**Dr. Amitava Mukherjee**

**Professor & Assistant Director**

**Centre for Nanobiotechnology**

**VIT University, Vellore - 632014**

**Email: [amit.mookerjee@gmail.com](mailto:amit.mookerjee@gmail.com)**

**Phone: 91 416 2202620**

**Fax: 91-416-2243092**

## RESULTS

### Spectral characterization of AgNP

**Table S1. The effect of AgNP/Cr (III) volume ratio on fluorescence intensity measured at a range of Cr (III) concentrations [range:  $10^{-3}$  M -  $10^{-7}$  M]**

| Volume of AgNP ( $\mu$ l) | Volume of Cr(III) ( $\mu$ l) | AgNP/Cr(III) volume ratio | Different Cr (III) concentrations |             |             |             |             |
|---------------------------|------------------------------|---------------------------|-----------------------------------|-------------|-------------|-------------|-------------|
|                           |                              |                           | $10^{-3}$ M                       | $10^{-4}$ M | $10^{-5}$ M | $10^{-6}$ M | $10^{-7}$ M |
| 700                       | 200                          | 3.5:1                     | 324 $\pm$ 1                       | 155 $\pm$ 1 | 138 $\pm$ 3 | 163 $\pm$ 1 | 110 $\pm$ 2 |
| 700                       | 300                          | 2.3:1                     | 252 $\pm$ 4                       | 150 $\pm$ 2 | 172 $\pm$ 1 | 163 $\pm$ 1 | 147 $\pm$ 3 |
| 700                       | 500                          | 1.4:1                     | 603 $\pm$ 1                       | 452 $\pm$ 2 | 307 $\pm$ 1 | 234 $\pm$ 1 | 152 $\pm$ 1 |

**Table S2. The effect of pH on fluorescence intensity measured at a range of Cr (III) concentrations [range:  $10^{-3}$  M -  $10^{-7}$  M]**

| pH | Different Cr (III) concentrations |             |             |             |             |
|----|-----------------------------------|-------------|-------------|-------------|-------------|
|    | $10^{-3}$ M                       | $10^{-4}$ M | $10^{-5}$ M | $10^{-6}$ M | $10^{-7}$ M |
| 5  | 203 $\pm$ 6                       | 141 $\pm$ 2 | 152 $\pm$ 2 | 117 $\pm$ 2 | 160 $\pm$ 1 |
| 6  | 603 $\pm$ 1                       | 452 $\pm$ 2 | 307 $\pm$ 1 | 234 $\pm$ 1 | 152 $\pm$ 1 |
| 7  | 195 $\pm$ 2                       | 195 $\pm$ 3 | 117 $\pm$ 2 | 156 $\pm$ 2 | 188 $\pm$ 3 |

**Table S3. Fluorescence data for all the Cr (III) concentrations in the range  $2 \times 10^{-8}$ –  $2 \times 10^{-9}$  M**

| Chromium concentration (M) | Fluorescences Intensity (Mean $\pm$ SD) |
|----------------------------|-----------------------------------------|
| $2 \times 10^{-8}$         | 80 $\pm$ 1                              |
| $1 \times 10^{-8}$         | 78 $\pm$ 1                              |
| $8 \times 10^{-9}$         | 76 $\pm$ 1                              |
| $6 \times 10^{-9}$         | 65 $\pm$ 1                              |
| $4 \times 10^{-9}$         | 45 $\pm$ 1                              |
| $2 \times 10^{-9}$         | 40 $\pm$ 1                              |

**Table S4. The comparison of Cr concentration observed by the current method to that measured by AAS for tap water and groundwater**

| Source                   | Fluorescence Intensity (Mean $\pm$ SD) | Chromium concentration range (ppb) | Chromium concentrations by AAS (ppb) |
|--------------------------|----------------------------------------|------------------------------------|--------------------------------------|
| Tap water                | 353 $\pm$ 3                            | 500-50                             | 187 $\pm$ 1                          |
| Ground water(Suthipattu) | 232 $\pm$ 2                            | 500-50                             | 66. $\pm$ 1                          |

**Figure S1.** A Normalized graph of AgNP with Cr (III) at various concentrations

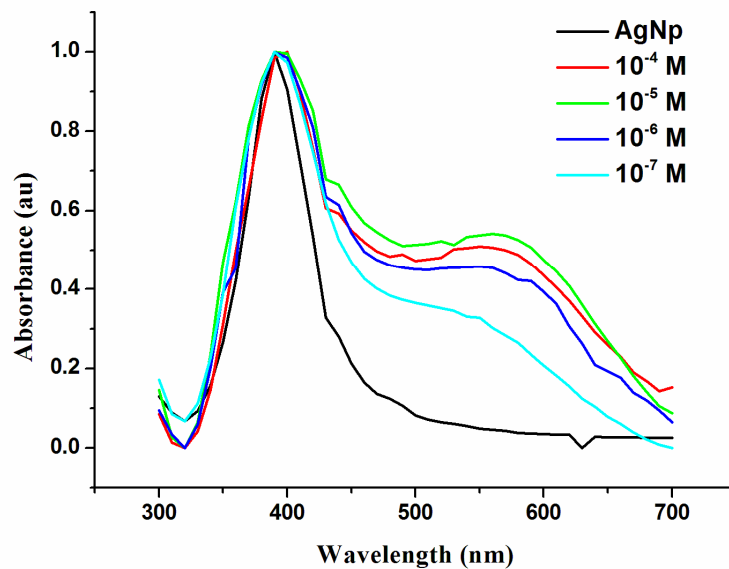

**Figure S2.** A fluorescence emission spectrum of un-interacted AgNP and AgNP interacted with Cr (III) at concentration range of  $10^{-3}$  M

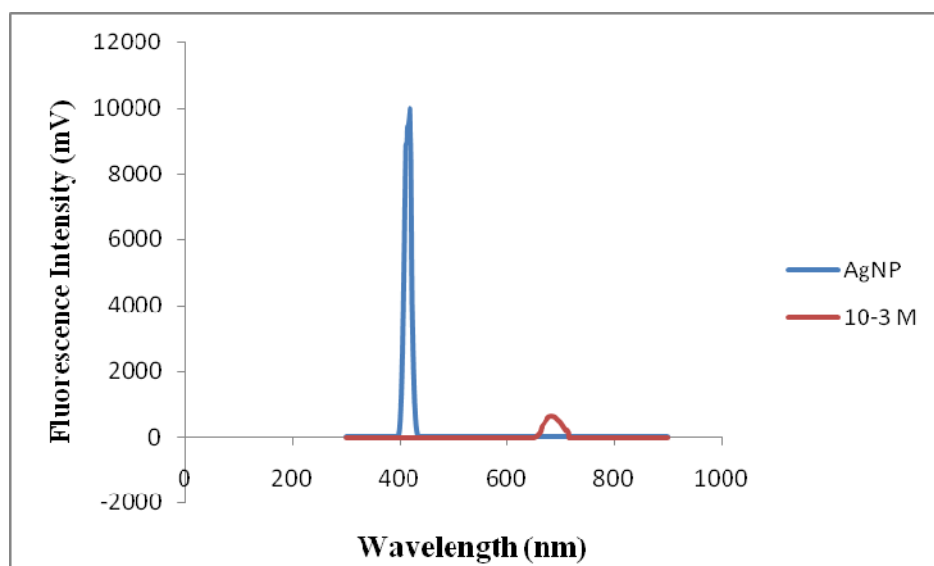

**Figure S3.** A fluorescence emission spectrum at different excitation wavelength

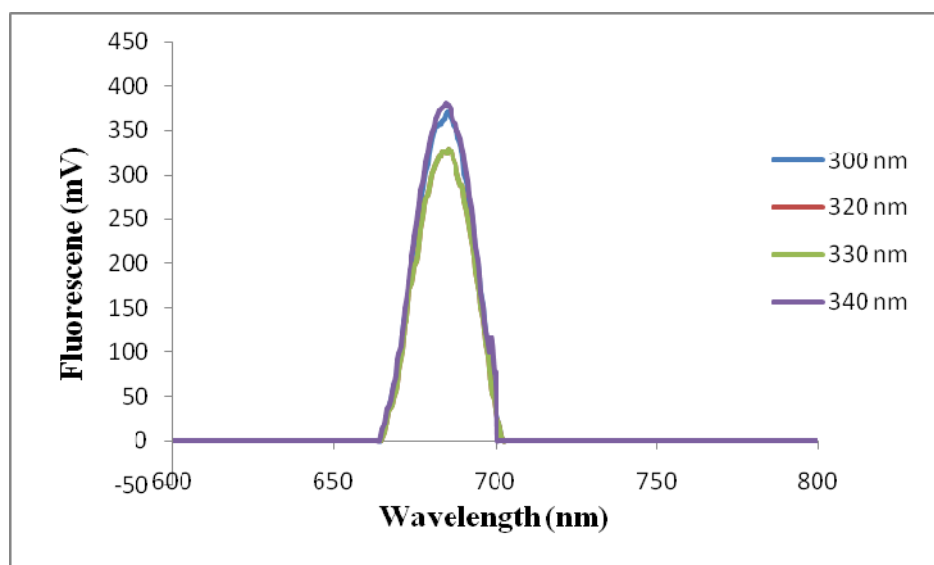

**Figure S4.** Variation of fluorescence intensity ratio measured against reaction time

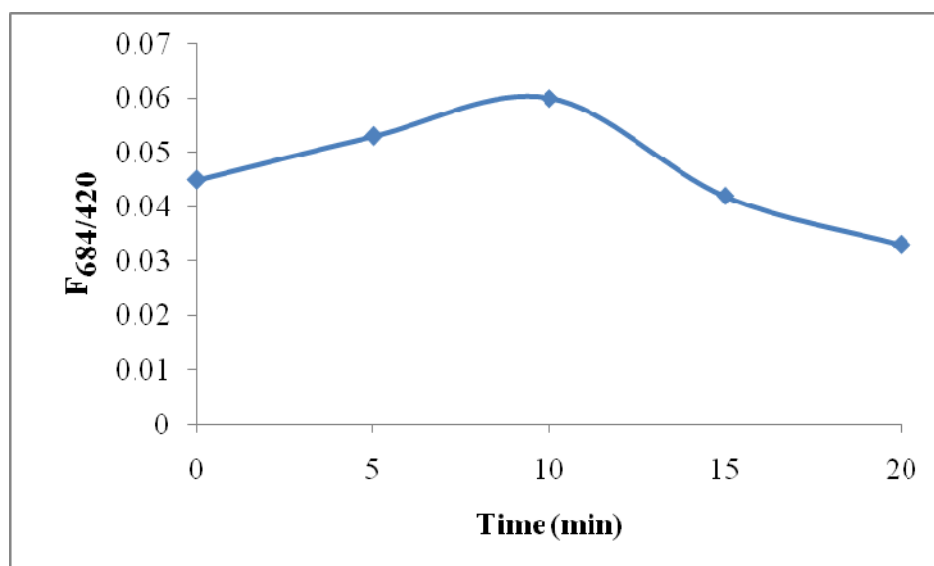

Supplement: c2ay25632k.pdf [file c2ay25632k.pdf]
